# Supplementary material
Source: Springer Nature journal article supplement (https://www.springermedizin.de/resource/supplementary/13643_2012_50_MOESM13_ESM.pdf/9681370)
Supplement: MOESM13 [file 9681370]

**Adaptation Activity-**  
integrating cultural values and elements into the intervention content

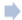

**Mechanism-**  
theorised as *'consonance'*

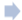

**Response**  
immigrants understand intervention in a symbolic sense – 'shared values'

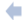

**Resistance** –  
dissonance if acculturated or if values are a source of oppression and stigma

**Context** – balance 'old country' and 'new country' values
